# Ecological outcomes of hybridization vary extensively in *Catostomus* fishes

Elizabeth G. Mandeville<sup>1,2,3</sup>, Robert O. Hall, Jr.<sup>3,4,5</sup>, and C. Alex Buerkle<sup>2,3</sup>

<sup>1</sup> Department of Integrative Biology, University of Guelph, Guelph, Ontario Canada

<sup>2</sup> Department of Botany, University of Wyoming, Laramie, Wyoming USA

<sup>3</sup> Program in Ecology, University of Wyoming, Laramie, Wyoming USA

<sup>4</sup> Present address: Flathead Lake Biological Station, University of Montana, Polson, Montana USA

<sup>5</sup> Department of Zoology and Physiology, University of Wyoming, Laramie, Wyoming USA

*Corresponding author:* Elizabeth Mandeville

50 Stone Road East

Department of Integrative Biology

University of Guelph

Guelph, Ontario, N1G 2W1, Canada

emandevi@uoguelph.ca

*Keywords:* Hybridization, ecological interactions, fitness, stable isotopes

*Running title:* Ecological outcomes of hybridization vary

## 1 **Abstract**

2 Hybridization has been studied extensively to learn about speciation and mechanisms of  
3 reproductive isolation, but increasingly we recognize that hybridization outcomes vary geo-  
4 graphically and can depend on the environment. At the same time, hybridization can reshape  
5 biotic interactions in an ecosystem, leading to ecological shifts where hybridization occurs.  
6 Identifying how hybrid individuals function ecologically would link evolutionary outcomes of  
7 hybridization to ecological consequences, but relatively few studies have focused on ecolog-  
8 ical traits of hybrids. We described the feeding ecology of several *Catostomus* fish species  
9 and their hybrids by using stable isotopes ( $\delta^{13}\text{C}$  and  $\delta^{15}\text{N}$ ) as a proxy for diet and habitat  
10 use, and compared two native species, an introduced species, and three interspecific hy-  
11 brid crosses. We replicated this comparison spatially, including hybrids and parental species  
12 from seven rivers in the Upper Colorado River basin where parental species co-occur and  
13 the opportunity for hybridization exists. Although relationships between native species in  
14 isotopic space varied, individual native species did not fully overlap in isotopic space in any  
15 river sampled, suggesting little overlap of resource use between these historically sympatric  
16 species. The introduced species overlapped with one or both native species in every river,  
17 suggesting similar resource use and potential for competition. Hybrids occupied intermedi-  
18 ate, matching, or more extreme (transgressive) isotopic space relative to parental species,  
19 and were isotopically variable within and among rivers. We suggest that ecological outcomes  
20 of hybridization, like genomic outcomes of hybridization, are likely to vary across locations  
21 where a pair of species hybridizes. This variation implies that hybridization might have  
22 large unpredictable, idiosyncratic ecological effects on fish assemblages where hybrids occur.  
23 Although we found little evidence that hybrids are at a disadvantage ecologically—there  
24 were no significant declines in body condition relative to parental species—it is nevertheless  
25 possible that abiotic or biotic attributes of a river might constrain the range of interspecific  
26 hybrids that are successful, thus contributing to variation in hybridization outcomes across  
27 rivers.

## 28 **Introduction**

29 Hybridization is a critical feature of many speciation processes and serves as a test of repro-  
30 ductive isolation between diverged lineages in secondary contact (Barton and Hewitt 1989,  
31 Harrison 1990). Studies of hybridization are motivated in part by a desire for generality  
32 in our understanding of how biodiversity arises and is maintained. While the increasing  
33 accessibility of large genomic datasets for wild populations has led to a newfound ability to  
34 study replicate outcomes of hybridization in the wild (Narum et al. 2013, McFarlane and  
35 Pemberton 2019), better information in some cases leads to a more nuanced and compli-  
36 cated understanding of evolution, and generates additional questions (Payseur and Rieseberg  
37 2016). Studies of hybridization in multiple locations have uncovered substantial variation  
38 in genomic outcomes of hybridization when a pair of species comes into contact repeatedly  
39 (Nolte et al. 2009, Lepais and Gerber 2011, Haselhorst and Buerkle 2013, Lagache et al. 2013,  
40 Mandeville et al. 2017), and it seems increasingly likely that ecological context, historical  
41 contingency, and stochasticity influence to what extent species remain reproductively iso-  
42 lated from their close relatives. Variable outcomes across replicate instances of hybridization  
43 between the same pair of species suggest not only variation within a species in mechanisms  
44 of reproductive isolation (Cutter 2012, Mandeville et al. 2017), but also variable porosity  
45 of boundaries to gene flow between species. Identifying the degree of ecological dependency  
46 and contingency in hybridization outcomes is therefore essential to understanding speciation  
47 and the persistence of biodiversity.

48 Mechanisms generating variation in hybridization outcomes remain unidentified in most  
49 hybridizing species pairs (Gompert et al. 2017). Ecological interactions and environmental  
50 conditions likely contribute significantly, and indeed, empirical examples of environmental  
51 dependence are known (e.g. Taylor and Donald McPhail 2000, Young et al. 2016, Muhlfeld  
52 et al. 2017, Mandeville et al. 2019). However, our understanding of the ecological context  
53 and consequences of hybridization is still largely incomplete, which is unfortunate, because

54 ecological context can influence outcomes of hybridization both by affecting relative fitness  
55 of hybrid and parental individuals (e.g. Arnold et al. 2012) and by limiting or increasing  
56 the opportunities for hybridization (e.g. Lepais and Gerber 2011). Fitness and ecological  
57 success of hybrids might also vary across independent instances of hybridization, with some  
58 phenotypes and genomic compositions of hybrids being favored in a subset of locations, and  
59 alternative traits and genotypes being favored in others. Differential ecological success of  
60 hybrids across replicate hybrid zones could selectively filter which genotypes persist (Lindtke  
61 et al. 2014), and might contribute to variation in hybridization outcomes across locations.  
62 However, few empirical studies have described both variation in hybridization outcomes and  
63 the ecological conditions that have either resulted from or shaped these outcomes.

64 In fish, ecological success of interspecific hybrids can depend on environmental conditions  
65 (e.g. in sticklebacks; Hatfield and Schluter 1999). The presence of hybrids can alter species  
66 interactions so growth, survival rate, or reproductive success of parental species is changed  
67 where hybridization occurs (as in trout; Rosenfield et al. 2004, Seiler and Keeley 2009). Phe-  
68 notypes related to foraging ability can be especially important in determining outcomes of  
69 interactions between traits of hybrids and the environment. Experimental work in fish has  
70 shown that hybrids are sometimes less successful than parental species when they have inter-  
71 mediate mouth morphology, because of an ecological mismatch between feeding morphology  
72 and available resources, leading to worse feeding performance (e.g. sunfish; McGee et al.  
73 2015) or reduced growth (e.g. sticklebacks; Arnegard et al. 2014). However, phenotypes  
74 of hybrids are hard to predict, and are not always intermediate between parental species  
75 (Rieseberg et al. 1999b, Stelkens et al. 2009). Instead, phenotypes of hybrid individuals  
76 might be similar to one of the parental species, or might differ from both parental species  
77 (e.g., Stelkens et al. 2009, Thompson et al. 2019).

78 Our goal for this study was to compare ecological interactions between multiple *Catosto-*  
79 *mus* fish species and their hybrid progeny across several rivers in Colorado and Wyoming.  
80 The focal *Catostomus* species are part of a clade with extensive and highly variable interspe-

81 cific hybridization between multiple species pairs (Hubbs et al. 1943, McDonald et al. 2008,  
82 Mandeville et al. 2015, 2017). We used stable isotopes of carbon and nitrogen as a proxy  
83 for diet and spatial resource use, and assessed patterns of ecological overlap first between  
84 parental species, and then between parental species and hybrid individuals. We compared  
85 patterns of ecological overlap across multiple geographic locations where fish were  
86 sampled, and analyzed the relationship between these ecological overlaps and genomic out-  
87 comes of hybridization in these rivers.

88 Genomic outcomes of hybridization in *Catostomus* can vary substantially over the ge-  
89 ographic range in which a pair of species co-occurs (Mandeville et al. 2015, 2017). While  
90 some hybridization between *Catostomus* species is precipitated by human-caused species  
91 introductions, most notably of *C. commersonii* (white sucker), this group of fishes likely  
92 has a long and convoluted history of hybridization (Hubbs et al. 1943, Hubbs 1955, Bangs  
93 et al. 2018), including a hypothesized allopolyploid origin (Ferris 1984). Contemporary hy-  
94 bridization between six geographically overlapping *Catostomus* species is extensive; several  
95 species have hybridized with more than one congener, resulting in at least 12 different hy-  
96 brid crosses (Mandeville et al. 2017). In some locations, few crosses were present despite  
97 sympatry of multiple parental species; in other locations, many different crosses involving  
98 the sympatric parental species occurred. Backcrossed hybrids and later-generation recom-  
99 binant hybrids were common in some locations, while other locations contained only first  
100 generation hybrids (Mandeville et al. 2015, 2017). Mechanisms driving this variation in hy-  
101 bridization outcomes remain unidentified. Environmental variation that affects opportunity  
102 for hybridization or intrinsic genetic variation in reproductive isolation could explain the  
103 variable hybridization outcomes that we observed in natural populations (Mandeville et al.  
104 2017). Another possibility, which we explore in this study, is that geographic variation in the  
105 ecological success and survival of hybrids might cause variation in hybridization outcomes.

106 One focal species, bluehead sucker (*Catostomus discobolus*), eats predominantly algae  
107 that grow in fast-moving, shallow portions of rivers (i.e., riffles), while the other two widespread

108 parental species, flannelmouth and white suckers (*C. latipinnis* and *C. commersonii*), eat  
109 more aquatic invertebrates and more often occur in deep, slow pools (Tronstad and Estes-  
110 Zumpf 2011, Cross et al. 2013, Walsworth et al. 2013). *Catostomus* species vary substantially  
111 in mouth morphology. *C. discobolus* and *C. platyrhynchus* have a distinctive “scraping ridge”  
112 that facilitates scraping algal biofilms from surfaces (Baxter et al. 1995). In contrast, the  
113 other species have no scraping ridge, but have fleshy lips in varying shapes and with differ-  
114 ent textures. Differences in diet and foraging location among species and hybrid crosses can  
115 be captured using stable isotopes. Stable isotopes of nitrogen ( $\delta^{15}\text{N}$ ) serve as a proxy for  
116 trophic position, and would therefore capture the difference between consuming algae and  
117 invertebrates; we expect higher values of  $\delta^{15}\text{N}$  for individuals consuming more invertebrates,  
118 because they are feeding on a higher trophic level (Post 2002). Stable isotopes of carbon  
119 ( $\delta^{13}\text{C}$ ) capture differences in carbon composition in diet, which can derive from intrinsic  
120 characteristics of dietary items (e.g. C3 versus C4 plants), but in rivers might also depend  
121 on patterns of  $\text{CO}_2$  exchange between water and air, source of  $\text{CO}_2$ , and flow velocity over  
122 biofilms (Finlay 2001, Newsome et al. 2007). Carbon stable isotopic ratios might therefore  
123 also differ depending on how much individuals feed in riffles or pools in a river. Separation of  
124 isotopic niches, as detected by stable isotope analysis, might be a key variable in persistence  
125 of closely related species, as in other fish species (e.g. sauger and walleye; Butt et al. 2017).  
126 We used stable isotope data to identify ecological overlaps between genetically-defined groups  
127 (Layman et al. 2007, Newsome et al. 2007). We compared ecological success of hybrids and  
128 parental species using body condition as a proxy for fitness and described the success of  
129 parental and hybrid fish in the context of their isotopic niche and overlap with other species  
130 or hybrids.

## 131 **Methods**

132 We combined stable isotope and genetic analyses of 506 individual fish to identify how an-  
133 cestry of *Catostomus* suckers is related to ecological niche. Sampling spanned seven different  
134 locations in the Upper Colorado River basin in Wyoming and Colorado (Table 1). Fisheries  
135 biologists from state agencies collected fin tissue from each individual fish. Fin tissue was  
136 used for both genetic analyses (Mandeville et al. 2015, 2017) and stable isotope analyses  
137 (this study). Locations for isotope analysis were chosen to include rivers with a range of  
138 hybridization outcomes, based on the results of Mandeville et al. (2017).

139 We included individuals from five *Catostomus* fish species, *C. discobolus* (bluehead sucker),  
140 *C. latipinnis* (flannelmouth sucker), *C. commersoni* (white sucker), *C. catostomus* (longnose  
141 sucker), and *C. platyrhynchus* (mountain sucker). Three focal species—bluehead, flannel-  
142 mouth, and white suckers—are geographically widespread in the Upper Colorado River basin  
143 and were present at most sampling sites, whereas longnose and mountain suckers were sam-  
144 pled in only one location each, but were included because they are part of food web inter-  
145 actions where present. Of the five species included in this study, bluehead, flannelmouth,  
146 and mountain suckers are native to the Upper Colorado River basin, and white and long-  
147 nose suckers were introduced in the Upper Colorado River basin (Baxter et al. 1995). It is  
148 unknown exactly when and how white and longnose suckers were introduced, but the intro-  
149 duction probably occurred in the past 100–150 years (Gelwicks et al. 2009, Senecal et al.  
150 2010). Recent work has focused on hybridization between the introduced white sucker and  
151 native bluehead and flannelmouth suckers (McDonald et al. 2008, Mandeville et al. 2015),  
152 but hybridization also sometimes occurs between the common native *Catostomus* species,  
153 bluehead and flannelmouth sucker (Hubbs et al. 1943, Mandeville et al. 2017). Additionally,  
154 in some locations mountain and longnose suckers hybridize with the more common species.  
155 Hybridization produces spatially heterogeneous outcomes, and different hybrids were sam-  
156 pled in different rivers, with variable amounts of backcrossing to parental species (Mandeville

157 et al. 2015, 2017, Fig. 1).

158 We used results of genomic analyses from Mandeville et al. (2017) to identify ancestry of  
159 individuals (Fig. 1). To briefly summarize, genomic analyses of hybridization for the individ-  
160 uals in this study used genotyping-by-sequencing data (Parchman et al. 2012). Specifically,  
161 we relied on results from a genetic clustering algorithm, **entropy** (Gompert et al. 2014, Shas-  
162 try et al. 2021), based on 11,221 single nucleotide polymorphisms (SNPs) to identify parental  
163 species and hybrids genetically. This analysis produced precise estimates of each individ-  
164 ual fish's ancestry, including proportion of ancestry from each parental species in hybrids.  
165 Estimates of interspecific ancestry from **entropy** also revealed extent of hybridization and  
166 backcrossing, so we know that a substantial proportion of hybrids in this study were  $F_1$  (first  
167 generation) hybrids or  $BC_1$  (backcrosses resulting from mating between an  $F_1$  hybrid and a  
168 parental individual). We used both categorical designations of ancestry (species or hybrid  
169 cross) and a continuously valued measure of ancestry (proportion of ancestry) as covariates  
170 for stable isotopic ratios and body condition of hybrids in this study. More extensive discus-  
171 sion of genomic outcomes of hybridization in *Catostomus* fishes can be found in Mandeville  
172 et al. (2017).

173 To obtain stable isotope data, we prepared samples of fin tissue for analysis of  $\delta^{13}\text{C}$  and  
174  $\delta^{15}\text{N}$  by first desiccating them in a drying oven (60 °C) for 2–3 days. Dried fin samples were  
175 analyzed the University of Wyoming Stable Isotope Facility (UW-SIF). UW-SIF ground  
176 dried fin into a powder, and then transferred an appropriate mass of sample into a tin.  
177 We then measured  $\delta^{13}\text{C}$  and  $\delta^{15}\text{N}$  ratios using a Finnigan DeltaPlus XP mass spectrometer  
178 connected to a Costech 4010 elemental analyzer. UW-SIF normalized values using known  
179 laboratory standards (keratin), and performed quality control on all data.

180 For each species or hybrid cross in each river, as defined by estimates of genetic ancestry  
181 (Mandeville et al. 2017), we estimated an ellipse in dual isotopic space to quantify the relative  
182 position of  $\delta^{13}\text{C}$  and  $\delta^{15}\text{N}$  values and variation in those values within a group (Layman et al.  
183 2007). We used the maximum likelihood **standard.ellipse** function in the **siar** package in



184 R to fit the standard ellipses (Parnell et al. 2010, Jackson et al. 2011). This model assumes  
185 that bivariate isotopic data (isotopic ratios of  $\delta^{13}\text{C}$  and  $\delta^{15}\text{N}$ ) for a group of individuals  
186 is best fit by a multivariate normal distribution, and uses sample means and a covariance  
187 matrix to estimate parameters of a standard ellipse containing approximately 40% of the  
188 data (Jackson et al. 2011). To account for potential underestimation of ellipse size at low  
189 sample sizes, a correction of  $(n-1)/(n-2)$  is applied to produce SEAc, a standard ellipse that  
190 is unbiased with respect to sample size. We used the SEAc version of the standard ellipse  
191 for all analyses, because simulations suggest that it is less sensitive to sample size variation  
192 and small sample size (Jackson et al. 2011), and our sample sizes varied across rivers and  
193 species sampled (Table 1). We quantified isotopic similarity of parental species and hybrids  
194 within each river using the `overlap` function in `siar` to calculate the overlap of standard  
195 ellipses (Jackson et al. 2011). Because rivers likely varied in baseline  $\delta^{13}\text{C}$  and  $\delta^{15}\text{N}$  ratios,  
196 as well as the food resources available, we calculated overlaps only within a river, not across  
197 rivers. We then compared area of isotopic overlap in each pair of species or hybrids across  
198 rivers to understand how consistent relative positions of species are in isotopic space.

199 We also assessed the distribution of individuals in isotopic space using a hierarchical  
200 Bayesian model, `isoclust`, written in JAGS and implemented through R (Code included in  
201 Supplement). This model identifies the best-supported number of distinct clusters in iso-  
202 topic space for each river, thus quantifying how clustered individuals are in resource use. We  
203 sequentially fit models for 1 to 6 clusters in isotopic space, where each individual is assigned  
204 categorically to a cluster, and identified the best fit of model to data using a penalized mea-  
205 sure of model deviance (pD). This approach complements our more conventional analyses  
206 where we quantified resource use by binning individuals a priori by species. By identifying  
207 statistically how many clusters are represented in isotope space, we can better quantify dis-  
208 tinctiveness and overlap across species and hybrid categories, rather than simply describing  
209 clusters qualitatively based on the assumption that individuals with similar ancestry will be  
210 ecologically similar (i.e., grouping by ancestry as in Fig. 2).

211 Finally, to characterize relative ecological success of parental species and hybrids, we  
212 calculated body condition using length and weight data for 255 individual fish that had these  
213 data available (Bolger and Connolly 1989, Jakob et al. 1996). Body condition is a fitness  
214 proxy, but because hybrids are likely to vary in fertility independent of their body condition,  
215 we interpret body condition as a correlate of ecological success but not necessarily of fitness.  
216 We used two methods, Fulton's condition factor (K; Bolger and Connolly 1989) and relative  
217 weight ( $W_r$ ; Wege and Anderson 1978). We first used Fulton's condition factor (Anderson  
218 and Neumann 1996) because it is simple and requires no species-specific constants, allowing  
219 use on hybrids as well as parental species. The equation we used is  $K = (W/L^3) \times 100,000$ .  
220 To avoid distortion due to ontogenetic body shape changes, we excluded individuals <200  
221 mm in total length. Although body condition can be affected by differences in body shape  
222 (e.g., degree of lateral compression), we assumed that the *Catostomus* species in this study  
223 are similar enough in shape to compare body condition across species within the genus using  
224 Fulton's condition factor. The only major difference in body shape among these species is  
225 that white suckers have a wider caudal peduncle, and bluehead and flannelmouth suckers  
226 have a more slender caudal peduncle (Baxter et al. 1995). We also used relative weight ( $W_r$ )  
227 to compare body condition for flannelmouth (Didenko et al. 2004) and white suckers (Bister  
228 et al. 2000), the two species with standard weight equations available (98 individual fish).  
229 These equations were developed based on typical length and weight for reference individuals  
230 in each species.  $W_r$  is thought to be better than Fulton's condition factor for comparing  
231 across species with different body shapes, but is also limited because not all species in this  
232 study could be included. There are not yet published equations for  $W_r$  for bluehead suckers,  
233 and more problematically, it is unclear which equation should be used for hybrid individuals  
234 or indeed whether any of the species-specific equations are appropriate for hybrid individuals.  
235 Hybrids were not included in  $W_r$  analyses, both because there is no developed equation, and  
236 because hybrids are likely more phenotypically heterogeneous than individuals from parental  
237 species, so applying an equation from a parental species would be inappropriate.

## 238 Results

239 Flannemouth suckers and bluehead suckers, which are both native to the rivers we studied,  
240 did not overlap in bivariate isotopic space (carbon and nitrogen isotopes) in any of the five  
241 sampling locations where both species were sampled (Fig. 2), suggesting minimal overlap of  
242 resource use. In two locations (Big Sandy River and Escalante Creek), these two species were  
243 substantially separated in dual isotope plots, whereas in the other three locations, standard  
244 ellipses for these species were directly adjacent but not overlapping (Fig. 2). Flannemouth  
245 suckers were more enriched in nitrogen than bluehead suckers in four of five rivers where  
246 both species were sampled, suggesting that flannemouth suckers feed on a higher trophic  
247 level. However, in one river (Little Sandy Creek), flannemouth suckers were differentiated  
248 from blueheads only in  $\delta^{15}\text{N}$ , not in  $\delta^{13}\text{C}$ . In another location (White River), flannemouth  
249 and bluehead suckers were differentiated only in  $\delta^{13}\text{C}$ , not in  $\delta^{15}\text{N}$ . In each river in this study,  
250 white sucker, a widespread introduced species, overlapped in dual isotope plots with at least  
251 one of the native species (Fig. 2). In four locations (Big Sandy River, Escalante Creek,  
252 Little Snake River, and Muddy Creek), white suckers overlapped with flannemouth suckers  
253 in isotopic space, and in one location, white suckers overlapped with bluehead suckers (Little  
254 Sandy Creek). In one location, white suckers overlapped with both parental species (Yampa  
255 River). The variation in overlap between native and introduced species suggests different  
256 ecological effects of the white sucker introduction in different locations.

257 The extent of backcrossing in flannemouth $\times$ white sucker hybridization correlated neg-  
258 atively with the overlap in isotopic niche in a river; there was less backcrossing of hy-  
259 brids to parental species in rivers with more ecological overlap between species, and more  
260 backcrossing in rivers with less ecological overlap between flannemouth and white suck-  
261 ers (Fig. 4B). Relative resource use of hybrids and parental species varied. In one river  
262 (Escalante Creek), bluehead $\times$ white and bluehead $\times$ flannemouth hybrids had intermediate  
263 isotope values between parental species for both carbon and nitrogen (Fig. 2, Fig. 5),

264 and also slightly overlapped with both parental species. In another river (White River),  
265 bluehead×flannelmouth hybrids overlapped with parental species in carbon isotopic ratio,  
266 but had extremely variable nitrogen ratios that were sometimes much lower than either  
267 parental species. Flannelmouth×white hybrids overlapped substantially in dual isotope  
268 plots with both white and flannelmouth suckers in three out of four rivers in this study  
269 where flannelmouth×white suckers were sampled, suggesting that some hybrid individuals  
270 might use similar food resources to parental species. In two locations (Escalante Creek and  
271 the Yampa River), a subset of flannelmouth×white hybrid individuals also had transgressive  
272 isotopic ratios (Fig. 6), or isotopic ratios that substantially exceeded the range of either  
273 parental species and were not intermediate between parental species. In Escalante Creek,  
274 these transgressive hybrids were more enriched in carbon than parental species, suggesting  
275 that they might use a different carbon source, consistent with foraging in a different location.  
276 In the Yampa River, transgressive hybrids were more enriched in nitrogen, suggesting that  
277 they might have foraged on a higher trophic level.

278 For the hierarchical Bayesian clustering analysis, models with 1–3 clusters best fit the  
279 isotopic ratio data for individual fish in each river (Fig. 3). However, these clusters of  
280 ecologically similar individuals did not correspond to species or hybrid crosses. The number  
281 of statistically supported clusters (1–3) was correlated with the number of species (2–5)  
282 sampled in each river ( $p = 0.0457$ ; Pearson correlation 0.764), but in each location, fewer  
283 clusters were identified in isotopic space than there were species present (Fig. 4A). There  
284 was no relationship between number of genetic categories (species plus hybrid crosses) and  
285 the number of statistically defined clusters in isotope space. Additionally, with the exception  
286 of bluehead suckers in the Big Sandy River and Muddy Creek, clusters defined by our model  
287 did not correspond to species (Fig. 3). Within a river, each cluster contained multiple  
288 species; similarly, individuals of the same species were typically spread across more than one  
289 model-defined cluster.

290 Body condition of suckers varied among rivers but not in any particularly predictive way

291 (Fig. 7, Fig. 8). Using Fulton’s condition factor, we compared all species and hybrids. In  
292 some locations, white suckers and hybrids had higher body condition than native bluehead  
293 and flannelmouth suckers. Relative body condition of species was different in different loca-  
294 tions; in some locations (Escalante Creek, White River) bluehead and flannelmouth suckers  
295 had similar body condition, while in one location (Yampa River) flannelmouth suckers had  
296 significantly better body condition than bluehead suckers. Similarly, in one location all  
297 hybrid crosses had similar condition factors to native species (Escalante Creek), while in  
298 other locations (Yampa River, White River) flannelmouth × white sucker hybrids had higher  
299 body condition than at least one native species. These results have some caveats, notably  
300 that it is difficult to compare Fulton’s condition factor across species with different body  
301 shapes. For this reason, we also used relative weight,  $W_r$ , to compare body condition in  
302 flannelmouth suckers and white suckers, the two species with existing  $W_r$  equations, in three  
303 locations where adequate numbers of both species were sampled. Estimates of  $W_r$  (Fig. 8)  
304 contradicted findings using Fulton’s condition factor, and showed that flannelmouth suckers  
305 were in significantly better condition than white suckers in one location (Escalante Creek),  
306 but in similar condition in the other two rivers where this both species were present.  $W_r$   
307 was similar for flannelmouth suckers and white suckers in the Little Snake River and Yampa  
308 River. Taken together, the two metrics of body condition suggest similar ecological success  
309 across ancestry classes.

## 310 **Discussion**

311 Ecological relationships between parental species and hybrid crosses varied extensively across  
312 the seven rivers in this study. Hybrids interacted differently with the parental species and  
313 potentially filled different ecological niches in different locations. The degree of variation  
314 across these streams—physical, ecological, and variation in the set of fish taxa—and the rela-  
315 tively low number of locations (seven) made it difficult to identify specific factors associated

316 with variation across streams. However, inclusion of seven locations is a central feature  
317 of this study—had we sampled a single location, we would have identified simpler, but not  
318 generally applicable, ecological outcomes of hybridization. We did identify an association  
319 between ecological crowding and more extensive hybridization between species. It is un-  
320 clear whether this intensified ecological overlap is a consequence of extensive hybridization,  
321 or whether hybridization occurs more extensively in areas with more crowded niche space.  
322 Both explanations are plausible and we discuss them in greater detail below.

### 323 **Patterns of ecological overlap among species and hybrids**

324 Ecological overlap as measured by isotopic niches (Layman et al. 2007, Newsome et al.  
325 2007) showed high variability among rivers and this variability correlated with the extent  
326 of hybridization (Fig. 4). Relationships among species in isotopic space varied across rivers.  
327 However, one consistent trend was that bluehead and flannelmouth suckers, the two native  
328 parental species, did not overlap substantially in isotopic space (Fig. 2). In three out of the  
329 five rivers with greater than one statistically supported cluster, individuals from these two  
330 species were largely but not entirely assigned to different clusters in our hierarchical Bayesian  
331 clustering algorithm (Fig. 3). We suggest that bluehead and flannelmouth sucker diets  
332 generally did not substantially overlap where the species co-occurred. Because both species  
333 are historically native to the study locations, it is possible that non-overlapping isotopic  
334 niches have evolved to avoid competition. The idea of ecological character displacement in  
335 response to competition has a long history in ecology (Connell 1980, Robinson and Wilson  
336 1994), and has previously been invoked to explain evolutionary origins and maintenance of  
337 species diversity (Schluter 2000, Seehausen 2007). Our results are consistent with evolution  
338 of divergent ecological niches in flannelmouth and bluehead suckers.

339 In contrast, introduced white suckers overlapped in isotopic niche space with flannel-  
340 mouth, bluehead, or with both species, suggesting some degree of shared resource use be-  
341 tween introduced white sucker and one or both native species at every location sampled.

342 Overlap of white suckers with bluehead suckers in some locations was unexpected because  
343 we anticipated white suckers would be more similar ecologically to flannelmouth than to  
344 bluehead suckers, due to similar mouth morphology and because white suckers preferen-  
345 tially eat invertebrates (Baxter et al. 1995, Cross et al. 2013, Walsworth et al. 2013). This  
346 overlap in isotopic space suggests that different native species might face competition from  
347 introduced white suckers in different rivers. Variable position of white suckers relative to  
348 the other species in this study also suggests that the resource use of white suckers might be  
349 flexible or opportunistic (as in Corse et al. 2009). If this pattern were true, then ecological  
350 flexibility and generalist traits of white suckers might have facilitated successful invasion of  
351 the Upper Colorado River basin, and might explain to some extent the success of hybrid  
352 individuals with white sucker ancestry.

353 Hybrid individuals also occupied different isotopic space relative to parental species in dif-  
354 ferent locations (Fig. 2). Hybridization of bluehead suckers with both flannelmouth and white  
355 suckers produced some hybrids that were intermediate in isotopic ratios relative to parental  
356 species (Fig. 5). However, some individual bluehead×white and bluehead×flannelmouth  
357 sucker hybrids also matched parental phenotypes in isotopic space, suggesting similarity of  
358 resource use to parental species. Intermediacy in diet might be linked to intermediacy in  
359 mouth morphology. Hybrid individuals with bluehead×white and bluehead×flannelmouth  
360 ancestry have intermediate mouth morphology, including a reduced scraping ridge (Hubbs  
361 et al. 1943, Hubbs 1955, Quist et al. 2009). Intermediate morphology in hybrids corresponds  
362 to intermediate diets in other fish species. Both stickleback and centrarchid fish hybrids use  
363 intermediate food sources when they have intermediate feeding morphology (Arnegard et al.  
364 2014, McGee et al. 2015), with variable ecological success depending on the quantity and  
365 quality of food resources available. A parental-like feeding phenotype might be advantageous  
366 to hybrid individuals if parental phenotypes are optimal for feeding on available resources  
367 (as in Arnegard et al. 2014), but also might lead to competition between the native parental  
368 species and their hybrid offspring if preferred resources are limited (as in Seiler and Keeley

2009). If overlap in isotopic space does correspond to consumption of similar food resources in these rivers, competition between hybrids and parental species might occur. Competition might therefore be a serious concern for conservation of native *Catostomus* species in locations where hybridization is ongoing and resources are limited. We currently do not know to what extent fish production in these rivers is resource limited, so we cannot infer whether selective pressures associated with competition are strong, but matching ecological phenotypes suggests that competition is possible.

Hybridization can also produce individuals with phenotypes that differ from either parental species and are not intermediate; indeed, novel phenotypes produced by hybridization have promoted evolutionary diversification in diverse groups of organisms (e.g. Rieseberg et al. 2003a, Marques et al. 2019, Meier et al. 2019). We observed transgressive isotopic ratios in a subset of flannelmouth×white hybrid individuals (Fig. 6). These individuals exceeded values for any other *Catostomus* species in these rivers, including parental species of the hybrids. In Escalante Creek,  $\delta^{13}\text{C}$  values for a subset of flannelmouth×white hybrids were transgressive. In the Yampa River,  $\delta^{15}\text{N}$  ratios for a subset of individuals were transgressive. Transgressive values for  $\delta^{13}\text{C}$  likely correspond to use of different carbon resources, potentially in a different part of the river (Finlay 2001). Transgressive values for  $\delta^{15}\text{N}$  could also correspond to use of a different portion of the river (e.g., feeding in a deep pool where denitrification is occurring), but nitrogen isotope values are more commonly interpreted as a rough indicator of trophic position (Post 2002).

Individual fish with transgressive  $\delta^{15}\text{N}$  might be feeding on a higher trophic level by eating more invertebrates than flannelmouth or white suckers, or consuming some other resource like larval fish. It is not possible to identify causes of elevated  $\delta^{15}\text{N}$  without additional data like direct observation of stomach contents and a detailed survey of the base of the food web, which are goals for future study. Examples of transgressive phenotypes in hybrids are well-documented in other organisms (Rieseberg et al. 1999a, Stelkens and Seehausen 2009), and hybrids can use different resources and habitats than parents (Rieseberg et al. 2003b,



396 Gompert et al. 2006, Rieseberg et al. 2007). In at least one other group of organisms, ci-  
397 chlid fishes, likelihood of transgressive phenotypes is correlated with evolutionary distance  
398 (Stelkens et al. 2009), but in *Catostomus* fishes the transgressive hybrids appear to result  
399 from hybridization between closely related and ecologically similar taxa (flannelmouth and  
400 white suckers). Transgressive phenotypes are unlikely to be fit when they initially arise,  
401 as they do not reflect a long history of adaptation, but some fraction of transgressive phe-  
402 notypes might confer a novel ability to use certain resources or habitats, and have been  
403 implicated as a potential source of evolutionary novelty in diversification (Rieseberg et al.  
404 2003b, Stelkens and Seehausen 2009). Regardless of specific drivers of elevated  $\delta^{13}\text{C}$  and  
405  $\delta^{15}\text{N}$ , transgressive isotopic ratios suggest that some individual hybrids might use different  
406 resources than parental species. In both of these rivers, isotopic ratios of hybrids had more  
407 among-individual variation than isotopic ratios of parental species, as shown by the slightly  
408 larger standard ellipse areas. Consumption of alternative resources could be advantageous in  
409 more crowded ecological niche space, such as locations containing many species and hybrids  
410 that overlap in dietary requirements.

## 411 **Food web effects of hybridization**

412 In rivers with extensive hybridization, niche space occupied by *Catostomus* species and  
413 their hybrids was more compressed (Fig. 2), and occupied by more species and hybrids that  
414 potentially overlap in resource use, suggesting that one potential effect of hybridization is  
415 ecological crowding, with potential for competition. In locations where two parental species,  
416 flannelmouth sucker and white sucker, overlapped more in isotopic space, there was less  
417 backcrossing and hybridization was mostly constrained to first generation hybrids (Fig. 4).  
418 These lines of evidence suggest that although there might be some filtering of hybridization  
419 outcomes by environmental conditions and available niche space, it is perhaps more likely  
420 that hybridization in *Catostomus* suckers could reshape food webs. Non-native species alter  
421 food web dynamics in freshwater fish communities, including isotopic niche (Sagouis et al.

2015, Rogosch and Olden 2020), but the role of hybrids is less well documented. One study of *Catostomus* ecology that used stable isotopes, Walsworth et al. (2013), showed that introduction of white suckers and other non-native species into tributaries of the Upper Colorado River basin could increase food chain length and increase niche crowding, consistent with our findings here. However, Walsworth et al. 2013 excluded hybrids, which make up a large fraction of the *Catostomus* fish present in many parts of the Upper Colorado River basin (Gill et al. 2007). In our study, it is notable that although the number of identified distinct clusters in isotopic space was correlated with number of parental species (Fig. 4), the same relationship did not hold for number of clusters and number of ancestry classes, i.e., parental species plus hybrid crosses. This finding suggests that hybrids were not likely to be accessing different resources or occupying available niches, except perhaps in the case of individuals with transgressive phenotypes, but rather were overlapping with ecological resource use of parental species, with the potential for competition. It is plausible that the degree of ecological crowding in a river might correspond to increased selection pressures for foraging success, as hybrids, non-native parental species, and native parental species compete for resources and space. Competition and

It is unclear what fitness consequences these interactions between parental species and hybrids might have. Attempts to use body condition as a measure of ecological success and proxy for fitness produced equivocal results, because different measures of body condition produced opposing patterns (Fig. 7, Fig. 8). These contradictory results illustrate some of the methodological challenges associated with estimating body condition (Peig and Green 2010), and suggest caution is warranted in attaching too much weight to body condition as a fitness proxy. A simpler approach, Fulton's condition factor ( $K$ ), fails to account for species-level differences in body shape. The *Catostomus* species in this study had similar body shapes, but white suckers have a wider caudal peduncle, while flannelmouth and bluehead have more slender caudal peduncles (Baxter et al. 1995). The other approach we used, calculating relative weight ( $W_r$ ) from preexisting standard weight equations, does account

449 for differences in body shape, but relies on equations developed from reference individuals,  
450 and could not be applied to all species, and especially not for hybrids. One particularly  
451 troubling aspect of the  $W_r$  approach for flannelmouth suckers was that the standard weight  
452 equation was developed using reference individuals from the Upper Colorado River basin  
453 (Didenko et al. 2004), where flannelmouth suckers are endemic, and where white suckers  
454 and hybrids have long been present. If there are negative effects of competition, they were  
455 incorporated into our conception of what a “standard” flannelmouth sucker should weigh  
456 due to the limitations of body condition indexes based on reference populations.

457 From calculations using Fulton’s condition factor, *Catostomus* hybrids were in similar  
458 or slightly better body condition than parental species (Fig. 7). Notably, however, the  
459 relationship between flannelmouth suckers and white suckers was reversed using  $W_r$ , with  
460 flannelmouth suckers in slightly better body condition (Fig. 8), which leaves some uncertainty  
461 about the accuracy and meaning of these comparisons. However, hybrids must have been  
462 at least moderately ecologically successful, because body condition in hybrids was similar to  
463 parental species using both metrics. One caveat is that we only sampled adults, which by  
464 definition must have been ecologically successful enough to survive to maturity. It is possible  
465 that hybrid individuals with less ecologically successful phenotypes were produced, but did  
466 not survive early life stages. In some known examples, a broad range of interspecific hybrids  
467 can be viable under favorable conditions, but only a subset of hybrid individuals survive in  
468 a given environment (as in *Populus* trees; Lindtke et al. 2014). It is possible that a similar  
469 filtering of a subset of hybrid genotypes occurred with *Catostomus* hybrids, and that the  
470 hybrids sampled as adults were those that survived strong selective pressures on ecological  
471 traits as juveniles.

472 More empirical studies of fitness in hybrid individuals, including *Catostomus* hybrids,  
473 will be needed to develop a more mechanistic understanding of hybridization. Clarifying this  
474 point is essential because relative fitness of parental species and hybrids has a profound effect  
475 on how hybridization affects the evolution of species (reviewed in Arnold M and Hodges 1995,

476 Arnold et al. 2012). In some instances of interspecific hybridization, as in tiger salamanders,  
477 hybrids survived at higher rates than either parental species (Fitzpatrick and Shaffer 2007).  
478 However, it is important to distinguish between the well-being of individuals—i.e., survival,  
479 growth, and ecological success—and reproductive success. Survival and growth cannot be  
480 equated with fitness if hybrids cannot reproduce, and there are many examples of hybrid  
481 sterility (e.g. Sweigart et al. 2006, Good et al. 2008). There might also be fitness differences  
482 between first-generation hybrids and later generation hybrids, particularly if there is hetero-  
483 sis in  $F_1$  hybrids. For example, in native westslope cutthroat trout (*Oncorhynchus clarkii*  
484 *lewisi*) and introduced rainbow trout (*Oncorhynchus mykiss*) hybridization,  $F_1$  hybrids had  
485 relatively high fitness, including high reproductive success, but later-generation hybrids had  
486 markedly lower fitness (Muhlfeld et al. 2009). Studies of fitness in wild, free-living popu-  
487 lations are logistically challenging, but would add to our understanding of the causes and  
488 consequences of interspecific hybridization.

## 489 **Conservation implications**

490 The common native parental species in this study, bluehead and flannelmouth suckers, are  
491 currently the target of extensive management and conservation efforts by state agencies (Gel-  
492 wicks et al. 2009, Senecal et al. 2010). Previous work on genomic outcomes of hybridization  
493 suggested that hybridization might act as a demographic sink due to reduced conspecific  
494 reproduction and apparent absence of hybrids beyond the  $F_1$  generation in some crosses  
495 (Mandeville et al. 2015, 2017). We can also now infer some potential ecological effects of  
496 hybridization. Hybrids and non-native parental species overlapped substantially in isotopic  
497 space with native parental species, which suggests that hybrids and introduced species oc-  
498 cupied similar ecological niches to native species, and therefore might compete for resources.  
499 Additionally, in some rivers hybrids and non-native species had better body condition than  
500 native species by one metric, suggesting that hybrids and introduced species might sometimes  
501 exploit resources better than parental species. When combined, these lines of evidence sug-

502 gest additional potential obstacles to conservation of native species: hybrids and introduced  
503 species are likely to compete with native species, but hybrids do not contribute substantially  
504 to the gene pool in some rivers. Thus, hybridization might sometimes be both a demo-  
505 graphic sink and a resource sink. However, the variability uncovered by both this study  
506 and genetic studies of hybridization suggest that these dynamics might vary substantially  
507 by river, making outcomes of hybridization more complicated to predict. If we had studied  
508 these ecological dynamics in a single river, our conclusions would have been incorrect; it is  
509 critical to recognize that ecological outcomes of hybridization, like genomic outcomes, may  
510 vary substantially and might require different conservation strategies in different locations.

## 511 **Conclusions**

512 In this study, we showed that ecological niches occupied by hybrid individuals varied within  
513 and across rivers. Across replicate locations where hybridization occurs, hybrids of similar  
514 ancestry had variable feeding ecology, either matching parental species isotopic ratios, in-  
515 termediate between parental species, or displaying a transgressive isotopic ratio beyond the  
516 range of either parental species. This variation might have arisen due to greater plasticity in  
517 hybrid feeding phenotypes, or might suggest that postzygotic selection constrained hybrids  
518 to the range of phenotypes that would be ecologically successful in a given location. We also  
519 suggest that overall food web structure might either influence hybridization, or be altered by  
520 the presence of hybrids and non-native species. Together, these results make a compelling  
521 case for more study of how ecological interactions can constrain or facilitate hybridization,  
522 and how hybridization might alter ecological function of communities and modify fitness  
523 landscapes for hybridizing species.

## 524 **Acknowledgments**

525 Isotope analysis was funded by the Biodiversity Institute at the University of Wyoming (Bio-  
526 diversity Research Grant to EGM). Genomic data were generated with funding through the  
527 Wyoming Game and Fish Department (State Wildlife Grant #001793 and Bureau of Land  
528 Management Cooperative Agreement 12AC20048) and Colorado Parks and Wildlife (Species  
529 Conservation Trust Fund project SCTF001C). EGM was supported in part by NIH INBRE  
530 funding to the University of Wyoming (NCRP P20RR016474/NIGMS P20GM103432) and  
531 by the UW Biodiversity Institute. Computing was accomplished with an allocation from  
532 from the University of Wyoming's Advanced Research Computing Center, on its Mount  
533 Moran IBM System X cluster (<http://n2t.net/ark:/85786/m4159c>) and Teton Intel x86\_64  
534 cluster (<https://doi.org/10.15786/M2FY47>). We also thank the Wyoming Game and Fish  
535 Department and Colorado Parks and Wildlife for providing samples and supporting our work  
536 on *Catostomus* hybridization, most notably Mark Smith, Kevin Gelwicks, Bobby Compton,  
537 and Kevin Thompson. We also thank the staff of the Stable Isotope Facility at the University  
538 of Wyoming, especially Chandelle MacDonald, for their assistance and expert advice. This  
539 manuscript was improved by comments from the Walters lab at the University of Wyoming  
540 and the Mandeville lab at the University of Guelph.

## References

- Anderson, R., and R. M. Neumann. 1996. Length, weight, and associated structural indices. Pages 447–482 *in* Fisheries Techniques, 2nd Edition. American Fisheries Society.
- Arnegard, M. E., M. D. McGee, B. Matthews, K. B. Marchinko, G. L. Conte, S. Kabir, N. Bedford, S. Bergek, Y. F. Chan, F. C. Jones, and Others. 2014. Genetics of ecological divergence during speciation. *Nature* 511:307–311.
- Arnold, M. L., E. S. Ballerini, and A. N. Brothers. 2012. Hybrid fitness, adaptation and evolutionary diversification: lessons learned from Louisiana Irises. *Heredity* 108:159–166.
- Arnold M, L., and S. A. Hodges. 1995. Are natural hybrids fit or unfit relative to their parents? *Trends in Ecology and Evolution* 10:67–71.
- Bangs, M. R., M. R. Douglas, S. M. Mussmann, and M. E. Douglas. 2018. Unraveling historical introgression and resolving phylogenetic discord within *Catostomus* (Osteichthys: Catostomidae). *BMC Evolutionary Biology* 18:1–16.
- Barton, N. H., and G. M. Hewitt. 1989. Adaptation, speciation and hybrid zones. *Nature* 341:497–503.
- Baxter, G. T., M. D. Stone, and L. Parker. 1995. Fishes of Wyoming. Wyoming Game and Fish Department Cheyenne.
- Bister, T. J., D. W. Willis, M. L. Brown, S. M. Jordan, R. M. Neumann, M. C. Quist, and C. S. Guy. 2000. Proposed Standard Weight ( $W_s$ ) Equations and Standard Length Categories for 18 Warmwater Nongame and Riverine Fish Species. *North American Journal of Fisheries Management* 20:570–574.
- Bolger, T., and P. L. Connolly. 1989. The selection of suitable indices for the measurement and analysis of fish condition. *Journal of Fish Biology* 34:171–182.

- Butt, J. C., R. L. Eberts, and C. M. Somers. 2017. Sympatric walleye *Sander vitreus* and sauger *Sander canadensis* in large reservoirs: Variable isotopic niche size and overlap across multiple time scales. *Fisheries Management and Ecology* 24:308–319.
- Connell, J. H. 1980. Diversity and the coevolution of competitors, or the ghost of competition past. *Oikos* 35:131–138.
- Corse, E., C. Costedoat, N. Pech, R. Chappaz, J. Grey, and A. Gilles. 2009. Trade-off between morphological convergence and opportunistic diet behavior in fish hybrid zone. *Frontiers in Zoology* 6:26.
- Cross, W. F., C. V. Baxter, E. J. Rosi-Marshall, R. O. Hall, T. A. Kennedy, K. C. Donner, H. A. W. Kelly, S. E. Z. Seegert, K. E. Behn, and M. D. Yard. 2013. Food-web dynamics in a large river discontinuum. *Ecological Monographs* 83:311–337.
- Cutter, A. D. 2012. The polymorphic prelude to Bateson–Dobzhansky–Muller incompatibilities. *Trends in Ecology and Evolution* 27:209–218.
- Didenko, A. V., S. A. Bonar, and W. J. Matter. 2004. Standard weight ( $W_s$ ) equations for four rare desert fishes. *North American Journal of Fisheries Management* 24:697–703.
- Ferris, S. D. 1984. Tetraploidy and the evolution of the catostomid fishes. Pages 55–93 *in* *Evolutionary Genetics of Fishes*. Springer, Boston.
- Finlay, J. C. 2001. Stable-carbon-isotope ratios of river biota: Implications for energy flow in lotic food webs. *Ecology* 82:1052–1064.
- Fitzpatrick, B. M., and H. B. Shaffer. 2007. Hybrid vigor between native and introduced salamanders raises new challenges for conservation. *Proceedings of National Academy of Sciences* 104:15793–15798.
- Gelwicks, K. R., C. J. Gill, A. I. Kern, and R. Keith. 2009. Current Status of Roundtail Chub,



- Flannelmouth Sucker and Bluehead Sucker in the Green River Drainage of Wyoming. Wyoming Game and Fish Department, Fish Division.
- Gill, C. J., K. R. Gelwicks, and R. M. Keith. 2007. Current distribution of bluehead sucker, flannelmouth sucker, and roundtail chub in seven subdrainages of the Green River, Wyoming. Page 121 *in* American Fisheries Society Symposium. Vol. 53. American Fisheries Society.
- Gompert, Z., J. A. Fordyce, M. L. Forister, A. M. Shapiro, and C. C. Nice. 2006. Homoploid hybrid speciation in an extreme habitat. *Science* 314:1923–1925.
- Gompert, Z., L. K. Lucas, C. A. Buerkle, M. L. Forister, J. A. Fordyce, and C. C. Nice. 2014. Admixture and the organization of genetic diversity in a butterfly species complex revealed through common and rare genetic variants. *Molecular Ecology* 23:4555–4573.
- Gompert, Z., E. G. Mandeville, and C. A. Buerkle. 2017. Analysis of population genomic data from hybrid zones. *Annual Review of Ecology Evolution and Systematics* 48:227–229.
- Good, J. M., M. A. Handel, and M. W. Nachman. 2008. Asymmetry and polymorphism of hybrid male sterility during the early stages of speciation in house mice. *Evolution* 62:50–65.
- Harrison, R. G. 1990. Hybrid zones: windows on evolutionary process. *Oxford Surveys in Evolutionary Biology* 7:69–128.
- Haselhorst, M. S. H., and C. A. Buerkle. 2013. Population genetic structure of *Picea engelmannii*, *P. glauca* and their previously unrecognized hybrids in the central Rocky Mountains. *Tree Genetics & Genomes* 9:669–681.
- Hatfield, T., and D. Schluter. 1999. Ecological speciation in sticklebacks: environment-dependent hybrid fitness. *Evolution* pages 866–873.
- Hubbs, C. L. 1955. Hybridization between fish species in nature. *Systematic Zoology* 4:1–20.

- Hubbs, C. L., L. C. Hubbs, and R. E. Johnson. 1943. Hybridization in Nature Between Species of Catostomid Fishes. University of Michigan Press.
- Jackson, A. L., R. Inger, A. C. Parnell, and S. Bearhop. 2011. Comparing isotopic niche widths among and within communities: SIBER—Stable Isotope Bayesian Ellipses in R. *Journal of Animal Ecology* 80:595–602.
- Jakob, E. M., S. D. Marshall, and G. W. Uetz. 1996. Estimating fitness : A comparison of body condition indices. *Oikos* 77:61–67.
- Lagache, L., E. K. Klein, E. Guichoux, and R. J. Petit. 2013. Fine-scale environmental control of hybridization in oaks. *Molecular Ecology* 22:423–436.
- Layman, C. A., D. A. Arrington, C. G. Montana, and D. M. Post. 2007. Can stable isotope ratios provide for community-wide measures of trophic structure? *Ecology* 88:42–48.
- Lepais, O., and S. Gerber. 2011. Reproductive patterns shape introgression dynamics and species succession within the European white oak species complex. *Evolution* 65:156–170.
- Lindtke, D., Z. Gompert, C. Lexer, and C. A. Buerkle. 2014. Unexpected ancestry of *Populus* seedlings from a hybrid zone implies a large role for postzygotic selection in the maintenance of species. *Molecular ecology* 23:4316—4330.
- Mandeville, E., T. Parchman, S. Song, K. Thompson, R. Compton, K. Gelwicks, and C. Buerkle. 2017. Inconsistent reproductive isolation revealed by interactions between *Catostomus* fish species. *Evolution Letters* 1:255–268.
- Mandeville, E. G., T. L. Parchman, D. B. McDonald, and C. A. Buerkle. 2015. Highly variable reproductive isolation among pairs of *Catostomus* species. *Molecular ecology* 24:1856–72.
- Mandeville, E. G., A. W. Walters, B. J. Nordberg, K. H. Higgins, J. C. Burckhardt, and

- C. E. Wagner. 2019. Variable hybridization outcomes in trout are predicted by historical fish stocking and environmental context. *Molecular Ecology* 28:3738–3755.
- Marques, D. A., K. Lucek, V. C. Sousa, L. Excoffier, and O. Seehausen. 2019. Admixture between old lineages facilitated contemporary ecological speciation in Lake Constance stickleback. *Nature Communications* 10.
- McDonald, D. B., T. L. Parchman, M. R. Bower, W. A. Hubert, and F. J. Rahel. 2008. An introduced and a native vertebrate hybridize to form a genetic bridge to a second native species. *Proceedings of National Academy of Sciences* 105:10837–10842.
- McFarlane, S. E., and J. M. Pemberton. 2019. Detecting the true extent of introgression during anthropogenic hybridization. *Trends in Ecology and Evolution* 34:315–326.
- McGee, M. D., J. W. Reustle, C. E. Oufiero, and P. C. Wainwright. 2015. Intermediate kinematics produce inferior feeding performance in a classic case of natural hybridization. *The American Naturalist* 186:807–814.
- Meier, J. I., R. B. Stelkens, D. A. Joyce, S. Mwaiko, N. Phiri, U. K. Schliewen, O. M. Selz, C. E. Wagner, C. Katongo, and O. Seehausen. 2019. The coincidence of ecological opportunity with hybridization explains rapid adaptive radiation in Lake Mweru cichlid fishes. *Nature Communications* 10:1–11.
- Muhlfeld, C. C., S. T. Kalinowski, T. E. McMahon, M. L. Taper, S. Painter, R. F. Leary, and F. W. Allendorf. 2009. Hybridization rapidly reduces fitness of a native trout in the wild. *Biology Letters* 5:328–331.
- Muhlfeld, C. C., R. P. Kovach, R. Al-Chokhachy, S. J. Amish, J. L. Kershner, R. F. Leary, W. H. Lowe, G. Luikart, P. Matson, D. A. Schmetterling, B. B. Shepard, P. A. H. Westley, D. Whited, A. Whiteley, and F. W. Allendorf. 2017. Legacy introductions and climatic variation explain spatiotemporal patterns of invasive hybridization in a native trout. *Global Change Biology* pages 1–12.

- Narum, S. R., C. A. Buerkle, J. W. Davey, M. R. Miller, and P. A. Hohenlohe. 2013. Genotyping-by-sequencing in ecological and conservation genomics. *Molecular Ecology* 22:2841–2847.
- Newsome, S. D., C. M. Del Rio, S. Bearhop, and D. L. Phillips. 2007. A niche for isotopic ecology. *Frontiers in Ecology and the Environment* 5:429–436.
- Nolte, A. W., Z. Gompert, and C. A. Buerkle. 2009. Variable patterns of introgression in two sculpin hybrid zones suggest that genomic isolation differs among populations. *Molecular Ecology* 18:2615–2627.
- Parchman, T. L., Z. Gompert, J. Mudge, F. Schilkey, C. W. Benkman, and C. A. Buerkle. 2012. Genome-wide association genetics of an adaptive trait in lodgepole pine. *Molecular Ecology* 21:2991–3005.
- Parnell, A. C., R. Inger, S. Bearhop, and A. L. Jackson. 2010. Source partitioning using stable isotopes: Coping with too much variation. *PLoS ONE* 5:1–5.
- Payseur, B. A., and L. H. Rieseberg. 2016. A genomic perspective on hybridization and speciation. *Molecular Ecology* 25:2337–2360.
- Peig, J., and A. J. Green. 2010. The paradigm of body condition: A critical reappraisal of current methods based on mass and length. *Functional Ecology* 24:1323–1332.
- Post, D. M. 2002. Using stable isotopes to estimate trophic position: models, methods, and assumptions. *Ecology* 83:703–718.
- Quist, M. C., M. R. Bower, W. A. Hubert, T. L. Parchman, and D. B. McDonald. 2009. Morphometric and meristic differences among bluehead suckers, flannelmouth suckers, white suckers, and their hybrids: Tools for the management of native species in the Upper Colorado River basin. *North American Journal of Fisheries Management* 29:460–467.

- Rieseberg, L. H., M. A. Archer, and R. K. Wayne. 1999*a*. Transgressive segregation, adaptation, and speciation. *Heredity* 83:363–372.
- Rieseberg, L. H., S.-C. Kim, R. A. Randell, K. D. Whitney, B. L. Gross, C. Lexer, and K. Clay. 2007. Hybridization and the colonization of novel habitats by annual sunflowers. *Genetica* 129:149–165.
- Rieseberg, L. H., O. Raymond, D. M. Rosenthal, Z. Lai, K. Livingstone, T. Nakazato, J. L. Durphy, A. E. Schwarzbach, L. A. Donovan, and C. Lexer. 2003*a*. Major ecological transitions in wild sunflowers facilitated by hybridization. *Science* 301:1211–1216.
- Rieseberg, L. H., J. Whitton, and K. Gardner. 1999*b*. Hybrid zones and the genetic architecture of a barrier to gene flow between two sunflower species. *Genetics* 152:713–727.
- Rieseberg, L. H., A. Widmer, A. M. Arntz, and J. M. Burke. 2003*b*. The genetic architecture necessary for transgressive segregation is common in both natural and domesticated populations. *Philosophical Transactions of the Royal Society London B* 358:1141–1147.
- Robinson, B. W., and D. S. Wilson. 1994. Character release and displacement in fishes: A neglected literature. *The American Naturalist* 144:596–627.
- Rogosch, J. S., and J. D. Olden. 2020. Invaders induce coordinated isotopic niche shifts in native fish species. *Canadian Journal of Fisheries and Aquatic Sciences* .
- Rosenfield, J. A., S. Nolasco, S. Lindauer, C. Sandoval, and A. Kodric-Brown. 2004. The role of hybrid vigor in the replacement of pecos pupfish by its hybrids with sheepshead minnow. *Conservation Biology* 18:1589–1598.
- Sagouis, A., J. Cucherousset, S. Villéger, F. Santoul, and S. Boulétreau. 2015. Non-native species modify the isotopic structure of freshwater fish communities across the globe. *Ecography* 38:979–985.

- Schluter, D. 2000. Ecological character displacement in adaptive radiation. *The American Naturalist* 156:S4–S16.
- Seehausen, O. 2007. Evolution and ecological theory: Chance, historical contingency and ecological determinism jointly determine the rate of adaptive radiation. *Heredity* 99:361–363.
- Seiler, S. M., and E. R. Keeley. 2009. Competition between native and introduced salmonid fishes: cutthroat trout have lower growth rate in the presence of cutthroat–rainbow trout hybrids. *Canadian Journal of Fisheries and Aquatic Sciences* 66:133–141.
- Senecal, A. C., K. R. Gelwicks, P. A. Cavalli, and R. M. Keith. 2010. WGFDF Short-term Plan for the Three Species in the Green River Drainage of Wyoming; 2009-2014. Wyoming Game and Fish Department, Fish Division.
- Shastry, V., P. E. Adams, D. Lindtke, E. G. Mandeville, T. L. Parchman, Z. Gompert, and C. A. Buerkle. 2021. Model-based genotype and ancestry estimation for potential hybrids with mixed-ploidy. *bioRxiv* .
- Stelkens, R., C. Schmid, O. Selz, and O. Seehausen. 2009. Phenotypic novelty in experimental hybrids is predicted by the genetic distance between species of cichlid fish. *BMC Evolutionary Biology* 9:283.
- Stelkens, R., and O. Seehausen. 2009. Genetic distance between species predicts novel trait expression in their hybrids. *Evolution* 63:884–897.
- Sweigart, A. L., L. Fishman, and J. H. Willis. 2006. A simple genetic incompatibility causes hybrid male sterility in *Mimulus*. *Genetics* 172:2465–2479.
- Taylor, E. B., and J. Donald McPhail. 2000. Historical contingency and ecological determinism interact to prime speciation in sticklebacks, *Gasterosteus*. *Proceedings of the Royal Society B: Biological Sciences* 267:2375–2384.

- Thompson, K. A., M. Urquhart-Cronish, K. D. Whitney, L. H. Rieseberg, and D. Schluter. 2019. Patterns, predictors, and consequences of dominance in hybrids. bioRxiv page 818658.
- Tronstad, L. M., and W. Estes-Zumpf. 2011. Is the Muddy Creek food web affected by coalbed natural gas inputs? Tech. rep., Report prepared by the Wyoming Natural Diversity Database for the Water Research Program, Laramie, Wyoming.
- Walsworth, T. E., P. Budy, and G. P. Thiede. 2013. Longer food chains and crowded niche space: effects of multiple invaders on desert stream food web structure. *Ecology of Freshwater Fish* 22:439–452.
- Wege, G. J., and R. O. Anderson. 1978. Relative weight (Wr): a new index of condition for largemouth bass. *New approaches to the management of small impoundments*. American Fisheries Society, North Central Division, Special Publication 5:79–91.
- Young, M. K., D. J. Isaak, K. S. McKelvey, T. M. Wilcox, D. M. Bingham, K. L. Pilgrim, K. J. Carim, M. R. Campbell, M. P. Corsi, D. L. Horan, D. E. Nagel, and M. K. Schwartz. 2016. Climate, demography, and zoogeography predict introgression thresholds in salmonid hybrid zones in Rocky Mountain streams. *PLoS ONE* 11:1–22.

Table 1: Fish were sampled from seven rivers in the Upper Colorado River basin. Individuals sampled included parental species and hybrids, abbreviated in the table below. (B = blue-head, F = flannelmouth, W = white. Hybrids are represented with a  $\times$  connecting parental species, i.e. flannelmouth  $\times$  white = F  $\times$  W).

| <b>Location</b>         | <b>Drainage</b> | <b>Individuals</b> | <b>Species</b> | <b>Hybrids (&gt; 3 ind)</b>              |
|-------------------------|-----------------|--------------------|----------------|------------------------------------------|
| Big Sandy River (WY)    | Green River     | 61                 | B, F, W        | –                                        |
| Little Sandy Creek (WY) | Green River     | 80                 | B, F, W        | F $\times$ W                             |
| Escalante Creek (CO)    | Gunnison        | 85                 | B, F, W        | B $\times$ F, B $\times$ W, F $\times$ W |
| White River (CO)        | White           | 55                 | B, F           | B $\times$ F                             |
| Little Snake River (WY) | Yampa           | 68                 | F, W           | B $\times$ W, F $\times$ W               |
| Yampa River (CO)        | Yampa           | 72                 | B, F, W        | B $\times$ W, F $\times$ W               |
| Muddy Creek (WY)        | Yampa           | 58                 | B, W           | B $\times$ W, F $\times$ W               |



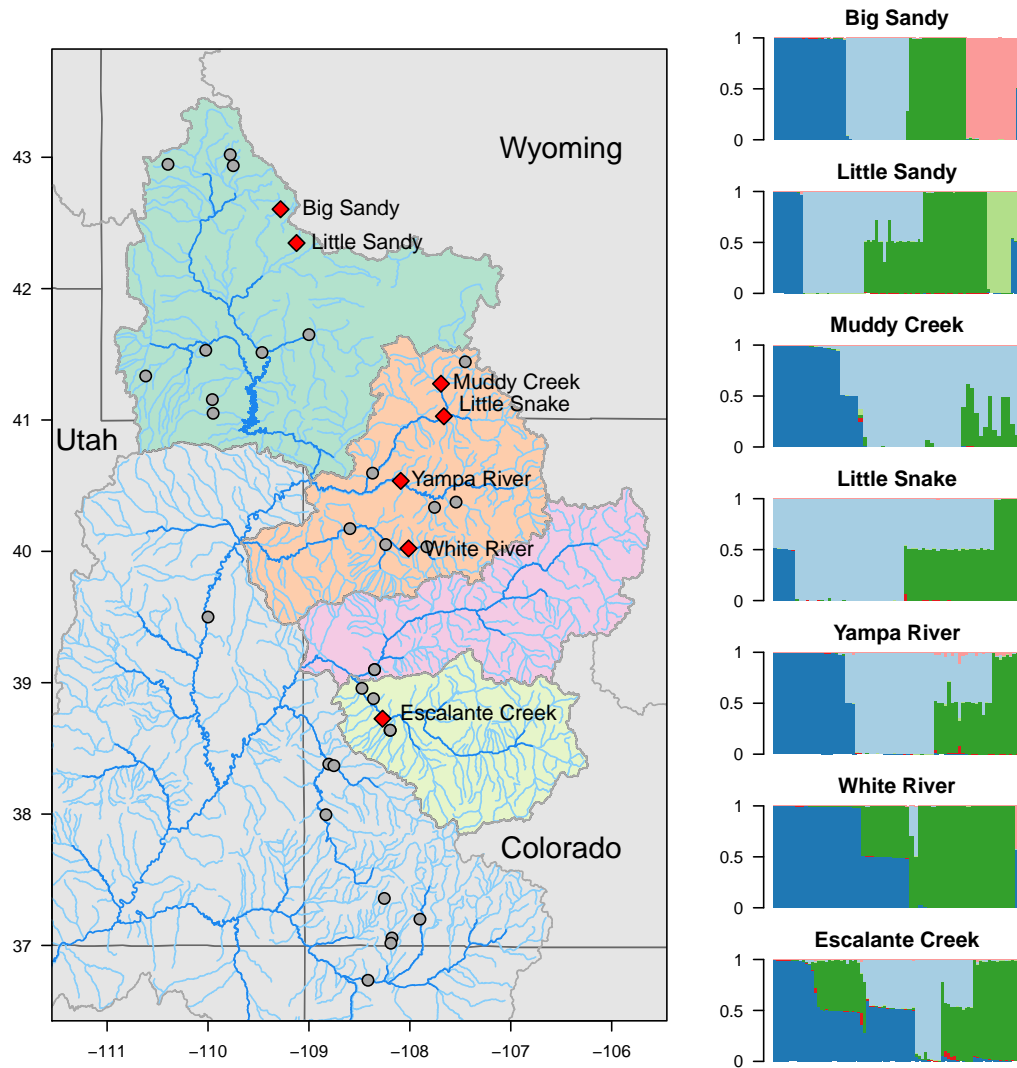

Figure 1: Seven rivers in Wyoming and Colorado and corresponding genetics outcomes of hybridization had indicated that a range of hybrids between *Catostomus* species were present (Mandeville et al. 2017). Gray dots represent all sampling points from Mandeville et al. (2017); the focal rivers for this study are shown with red diamonds. Barplots at right show proportional genetic ancestry of individual fish used for stable isotope analysis (dark blue = bluehead sucker; light blue = white sucker; dark green = flannelmouth sucker; pink = longnose sucker; light green = mountain sucker).

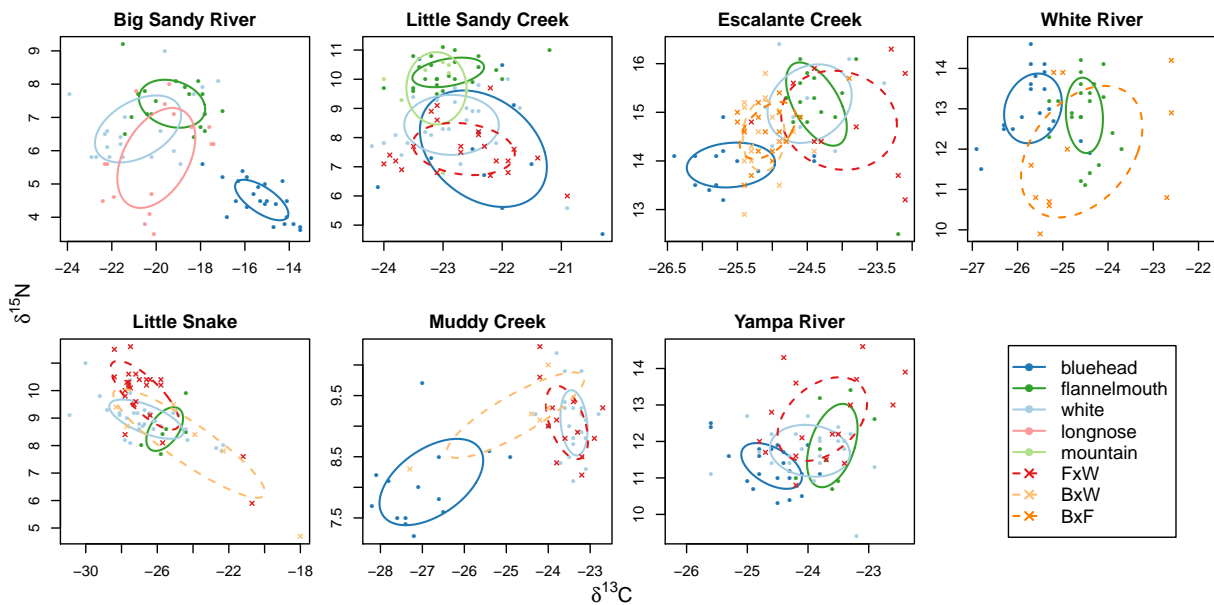

Figure 2: Standard ellipses summarize stable isotopic ratios ( $\delta^{13}\text{C}$  and  $\delta^{15}\text{N}$ ) by encompassing approximately 40% of individual fish within each of five species and three hybrid crosses. Ellipses were estimated using a maximum likelihood and a bivariate normal distribution, implemented in SIAR (Jackson et al. 2011). Species ellipses are solid lines; hybrid ellipses are dashed lines. Ecological relationships between parental species varied across rivers, but the two native parental species (bluehead and flannelmouth) did not overlap in isotopic space in any sampled locations. Hybrids among these three parental species had matching, intermediate, or transgressive isotopic signatures relative to parental species.

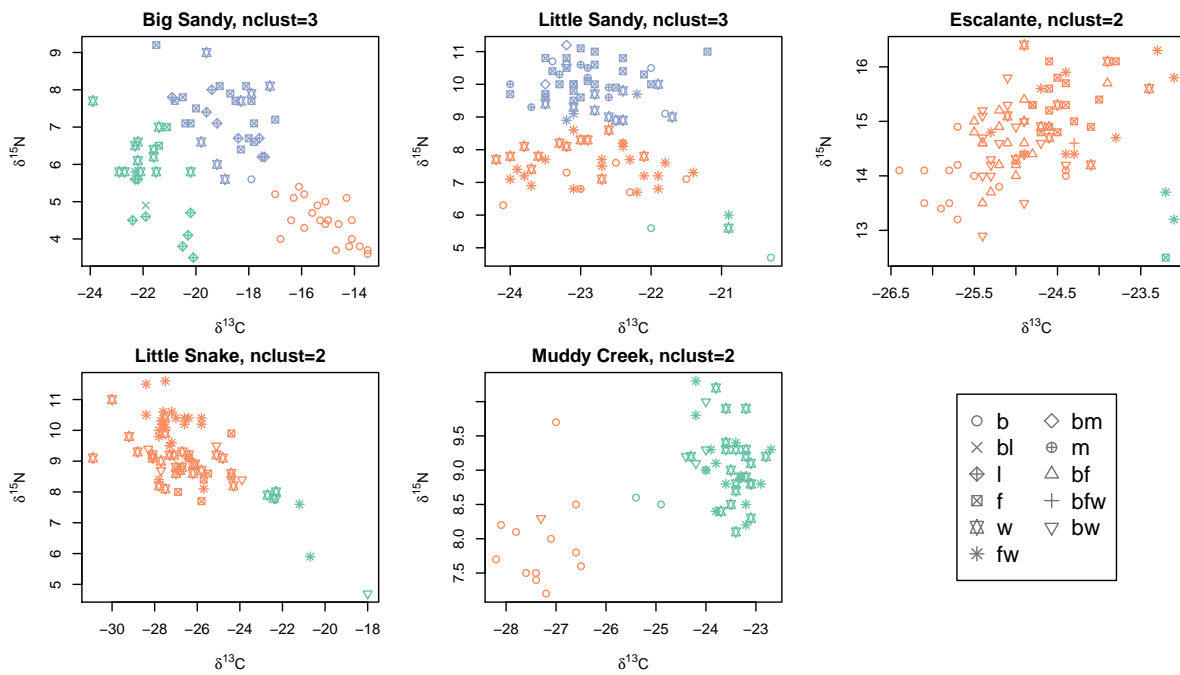

Figure 3: Results of a hierarchical Bayesian clustering algorithm were plotted in dual isotopic space for the five rivers where the optimal number of clusters was greater than 1. Point color corresponds to cluster membership as estimated by our model; point shape corresponds to species or hybrid cross. Estimates of the optimal number of clusters in isotopic space and membership of individuals in those clusters suggest that defined clusters did not correspond closely to species or hybrid categories in most cases.

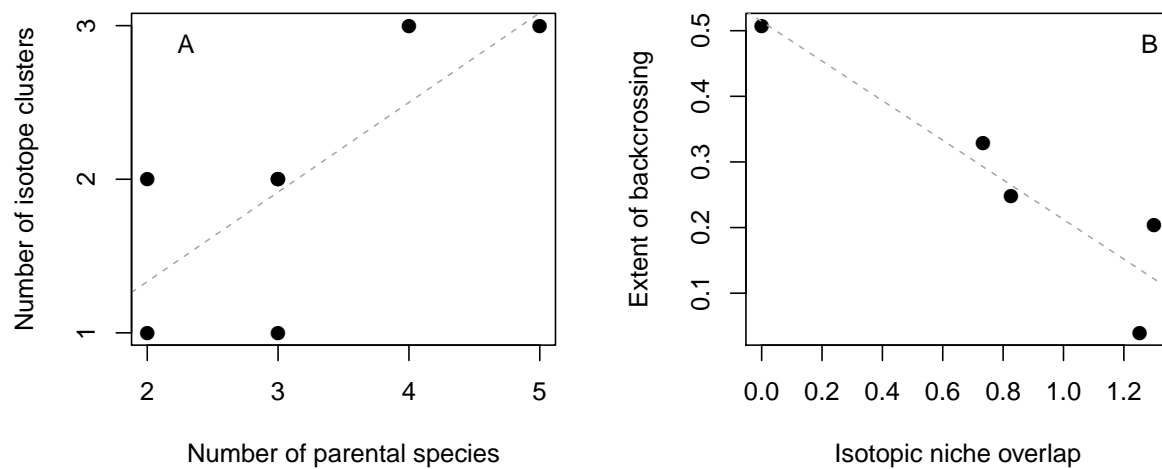

Figure 4: A) Number of clusters of ecologically similar individuals (identified by a hierarchical Bayesian model) correlated with the number of parental species sampled in a river. B) Extent of backcrossing in flannelmouth $\times$ white hybrids negatively correlated with the degree of isotopic niche overlap in 6 river locations.

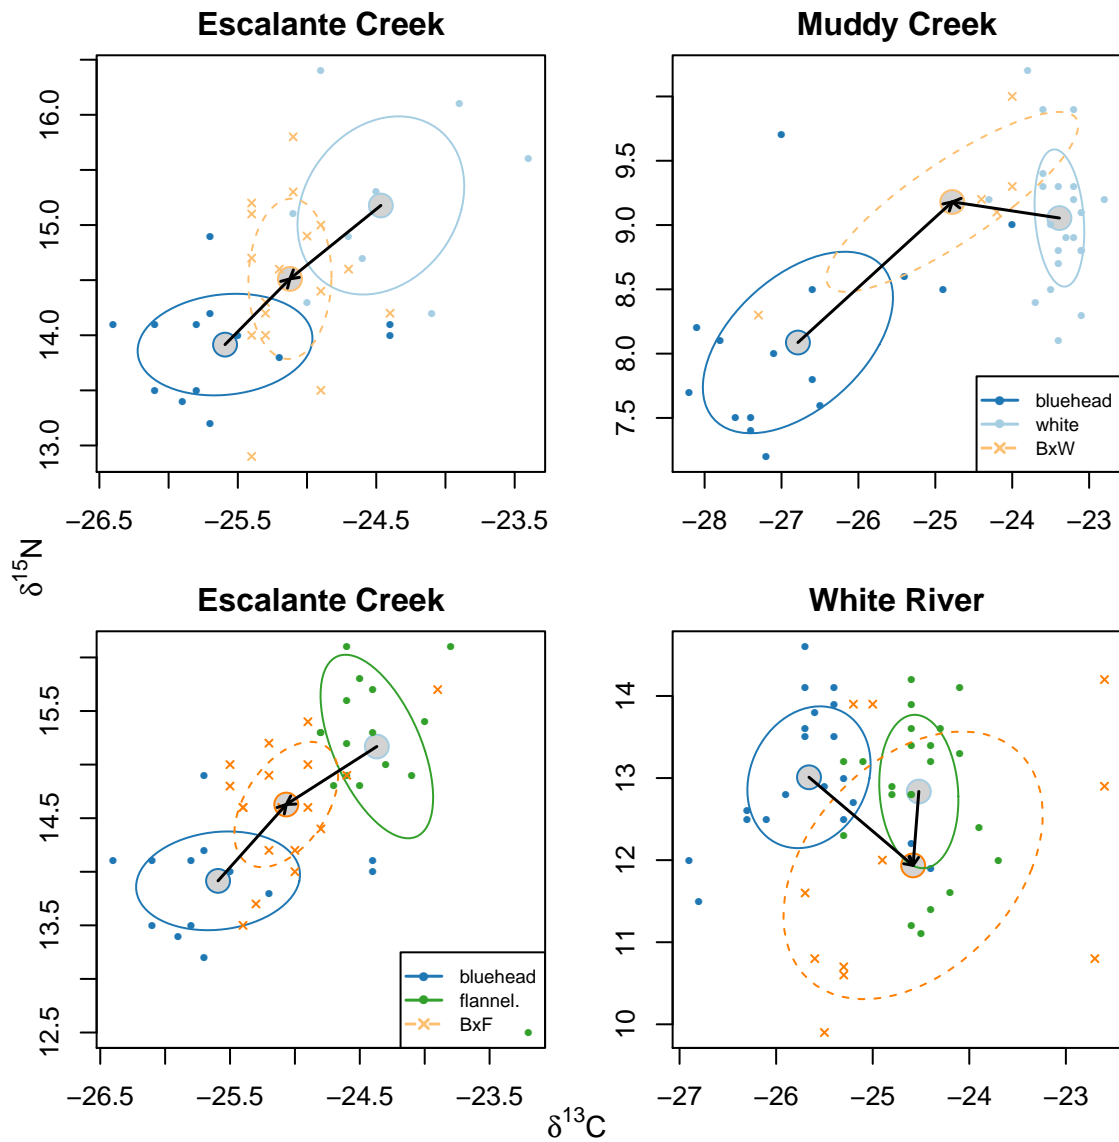

Figure 5: Mean carbon and nitrogen isotopic ratios for bluehead  $\times$  white sucker hybrids (top panels) were intermediate between values for the two parental species in both carbon and nitrogen, as shown by arrows from the mean for parental species to the mean for hybrid individuals. Mean carbon and nitrogen isotopic ratios for bluehead  $\times$  flannelmouth sucker hybrids (bottom panels) were intermediate between values for the two parental species Escalante Creek, but transgressive relative to parental species in the White River as shown by arrows from the mean for parental species to the mean for hybrids. Means are shown with gray points; individual fish are denoted by points color-coded by species or hybrid cross.

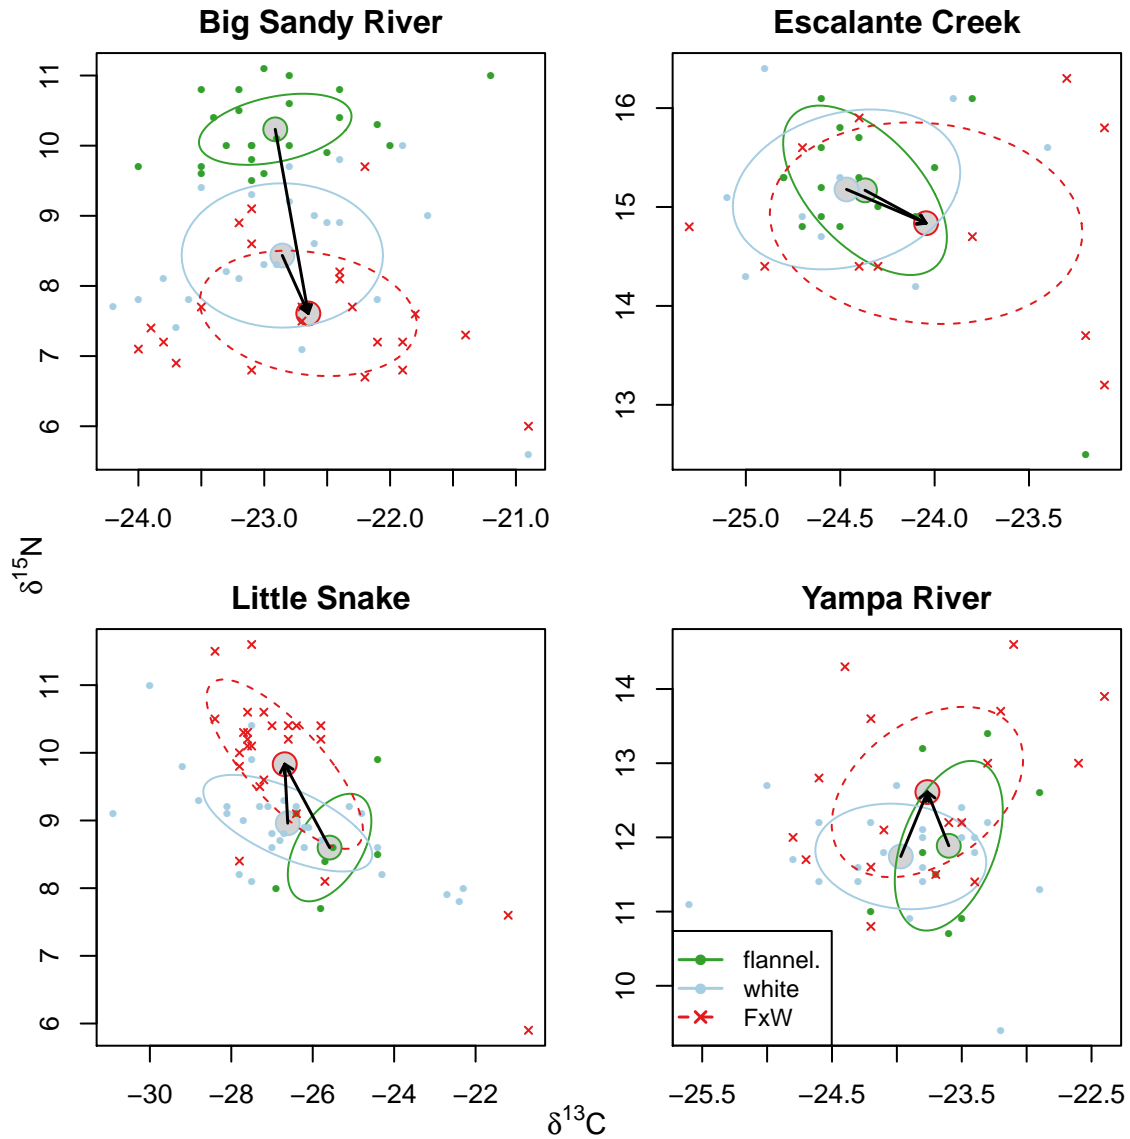

Figure 6: Mean carbon and nitrogen isotopic ratios for flannelmouth and white suckers were similar in most locations. However, as shown by arrows from the mean for parental species to the mean for hybrid individuals, mean values for flannelmouth $\times$ white hybrids were transgressive relative to means of parental species. Means are shown with gray points; individual fish are denoted by points color-coded by species or hybrid cross.

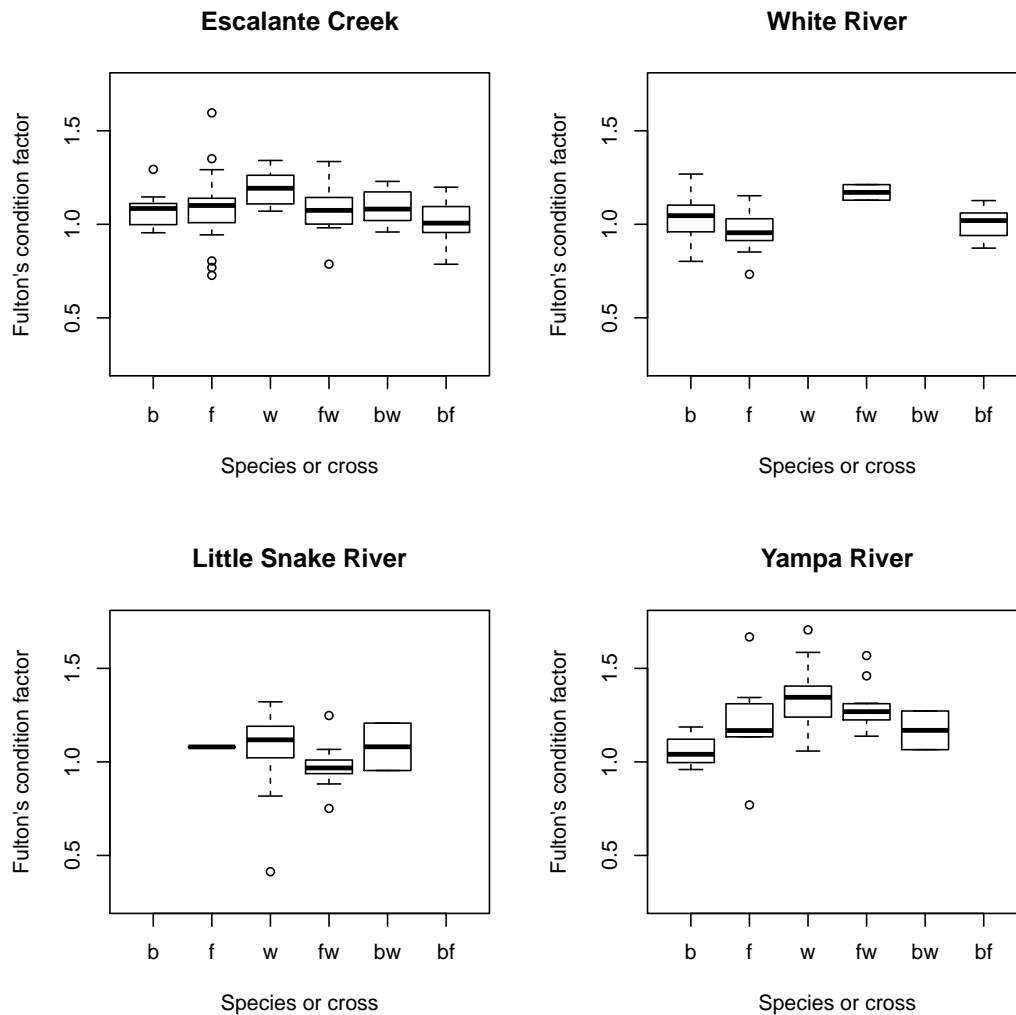

Figure 7: Hybrids and non-native white suckers had similar or higher body condition indices compared to native bluehead and flannelmouth suckers using Fulton's condition factor. Relative condition of species and hybrid crosses varied across rivers.

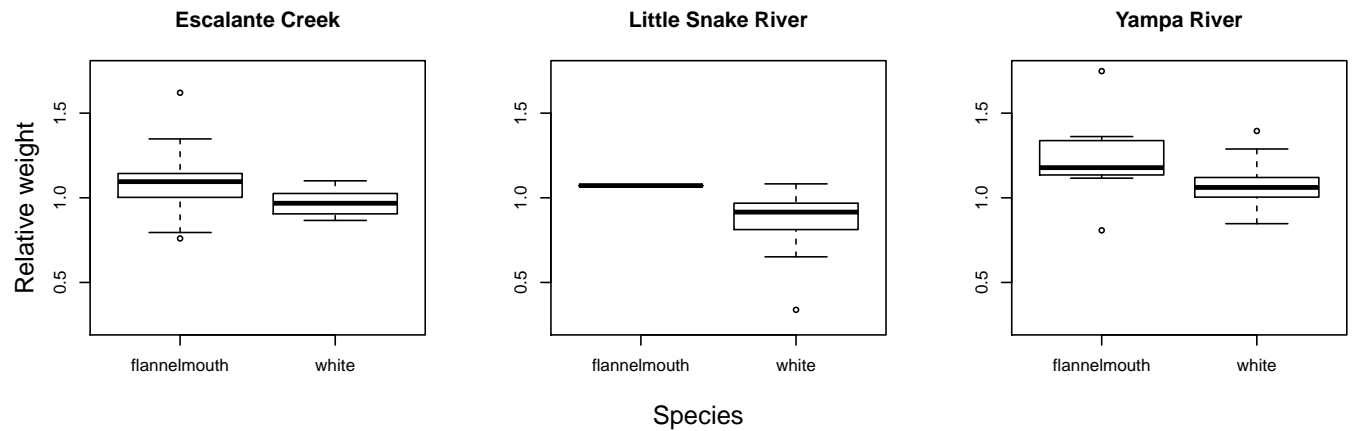

Figure 8: Flannelmouth suckers and white suckers had similar relative weights according to  $W_r$  equations available for these two species. In one river, Escalante Creek, flannelmouth suckers were in better condition according to  $W_r$  estimates; in the other 3 rivers no differences between species were identified.
